# Supplementary material for: Cardiovascular and Respiratory Health Effects of Fine Particulate Matters (PM2.5): A Review on Time Series Studies
Source: MDPI journal article supplement (doi:10.3390/atmos14050856), 2023-05-11
Supplement: s1 [file s1]

**Table S1:** List of 138 accepted articles for scoping review on time series studies of PM<sub>2.5</sub> and health effects.

|     |                                                                                                                                                                                                                                                                                                                                                                  |
|-----|------------------------------------------------------------------------------------------------------------------------------------------------------------------------------------------------------------------------------------------------------------------------------------------------------------------------------------------------------------------|
| 1.  | Bravo, M.A.; Ebisu, K.; Dominici, F.; Wang, Y.; Peng, R.D.; Bell, M.L. Airborne Fine Particles and Risk of Hospital Admissions for Understudied Populations: Effects by Urbanicity and Short-Term Cumulative Exposures in 708 U.S. Counties. <i>Environ Health Perspect</i> <b>2017</b> , <i>125</i> , 594–601, doi:10.1289/EHP257.                              |
| 2.  | Çapraz, Ö.; Deniz, A.; Doğan, N. Effects of Air Pollution on Respiratory Hospital Admissions in İstanbul, Turkey, 2013 to 2015. <i>Chemosphere</i> <b>2017</b> , <i>181</i> , 544–550, doi:10.1016/j.chemosphere.2017.04.105.                                                                                                                                    |
| 3.  | Chen, Q.; Wang, Q.; Xu, B.; Xu, Y.; Ding, Z.; Sun, H. Air Pollution and Cardiovascular Mortality in Nanjing, China: Evidence Highlighting the Roles of Cumulative Exposure and Mortality Displacement. <i>Chemosphere</i> <b>2021</b> , <i>265</i> , 129035, doi:10.1016/j.chemosphere.2020.129035.                                                              |
| 4.  | Chen, R.; Gao, Q.; Sun, J.; Yang, H.; Li, Y.; Kang, F.; Wu, W. Short-Term Effects of Particulate Matter Exposure on Emergency Room Visits for Cardiovascular Disease in Lanzhou, China: A Time Series Analysis. <i>Environ Sci Pollut Res</i> <b>2020</b> , <i>27</i> , 9327–9335, doi:10.1007/s11356-020-07606-w.                                               |
| 5.  | Ebisu, K.; Malig, B.; Hasheminassab, S.; Sioutas, C. Age-Specific Seasonal Associations between Acute Exposure to PM <sub>2.5</sub> Sources and Cardiorespiratory Hospital Admissions in California. <i>Atmospheric Environment</i> <b>2019</b> , <i>218</i> , 117029, doi:10.1016/j.atmosenv.2019.117029.                                                       |
| 6.  | Kowalska, M.; Skrzypek, M.; Kowalski, M.; Cyrus, J. Effect of NO <sub>x</sub> and NO <sub>2</sub> Concentration Increase in Ambient Air to Daily Bronchitis and Asthma Exacerbation, Silesian Voivodeship in Poland. <i>Int J Environ Res Public Health</i> <b>2020</b> , <i>17</i> , doi:10.3390/ijerph17030754.                                                |
| 7.  | Krall, J.R.; Mulholland, J.A.; Russell, A.G.; Balachandran, S.; Winquist, A.; Tolbert, P.E.; Waller, L.A.; Sarnat, S.E. Associations between Source-Specific Fine Particulate Matter and Emergency Department Visits for Respiratory Disease in Four U.S. Cities. <i>Environ Health Perspect</i> <b>2017</b> , <i>125</i> , 97–103, doi:10.1289/EHP271.          |
| 8.  | Leepe, K.A.; Li, M.; Fang, X.; Hiyoshi, A.; Cao, Y. Acute Effect of Daily Fine Particulate Matter Pollution on Cerebrovascular Mortality in Shanghai, China: A Population-Based Time Series Study. <i>Environ Sci Pollut Res Int</i> <b>2019</b> , <i>26</i> , 25491–25499, doi:10.1007/s11356-019-05689-8.                                                      |
| 9.  | Lu, M.; Yang, H.; Wang, J.; An, Z.; Li, J.; Wu, Z.; Zhao, Q.; Li, H.; Zhai, D.; Liu, Y.; et al. Acute Effects of Ambient Air Pollution on Outpatients with Chronic Rhinitis in Xinxiang, China. <i>Environ Sci Pollut Res Int</i> <b>2021</b> , <i>28</i> , 9889–9897, doi:10.1007/s11356-020-11534-0.                                                           |
| 10. | Menezes, R.A. de M.; Pavanitto, D.R.; Nascimento, L.F.C. Different Response to Exposure to Air Pollutants in Girls and Boys. <i>Rev Paul Pediatr</i> <b>2019</b> , <i>37</i> , 166–172, doi:10.1590/1984-0462/2019/37;2;00009.                                                                                                                                   |
| 11. | Nayebare, S.R.; Aburizaiza, O.S.; Siddique, A.; Carpenter, D.O.; Zeb, J.; Aburizaiza, A.J.; Pantea, C.; Hussain, M.M.; Khwaja, H.A. Association of Fine Particulate Air Pollution with Cardiopulmonary Morbidity in Western Coast of Saudi Arabia. <i>Saudi Med J</i> <b>2017</b> , <i>38</i> , 905–912, doi:10.15537/smj.2017.9.18545.                          |
| 12. | Oh, J.; Han, C.; Lee, D.-W.; Jang, Y.; Choi, Y.-J.; Bae, H.J.; Kim, S.; Ha, E.; Hong, Y.-C.; Lim, Y.-H. Short-Term Exposure to Fine Particulate Matter and Hospitalizations for Acute Lower Respiratory Infection in Korean Children: A Time-Series Study in Seven Metropolitan Cities. <i>IJERPH</i> <b>2020</b> , <i>18</i> , 144, doi:10.3390/ijerph18010144. |
| 13. | Qiu, H.; Bai, C.-H.; Chuang, K.-J.; Fan, Y.-C.; Chang, T.-P.; Yim, S.H.-L.; Ho, K.-F. Association of Ambient Non-Methane Hydrocarbons Exposure with Respiratory Hospitalizations: A Time Series Study in Taipei, Taiwan. <i>Science of The Total Environment</i> <b>2020</b> , <i>729</i> , 139010, doi:10.1016/j.scitotenv.2020.139010.                         |
| 14. | Qiu, H.; Wang, L.; Zhou, L.; Pan, J. Coarse Particles (PM <sub>2.5-10</sub> ) and Cause-Specific Hospitalizations in Southwestern China: Association, Attributable Risk and Economic Costs. <i>Environmental Research</i> <b>2020</b> , <i>190</i> , 110004, doi:10.1016/j.envres.2020.110004.                                                                   |
| 15. | Salimi, F.; Henderson, S.B.; Morgan, G.G.; Jalaludin, B.; Johnston, F.H. Ambient Particulate Matter, Landscape Fire Smoke, and Emergency Ambulance Dispatches in Sydney, Australia. <i>Environ Int</i> <b>2017</b> , <i>99</i> , 208–212, doi:10.1016/j.envint.2016.11.018.                                                                                      |
| 16. | Shan, W.; Lu, Y.; Guo, Y.; Li, Y.; Xu, L.; Cao, L. Short-Term Association between Particular Matter Air Pollution and Pediatric Clinical Visits for Wheezing in a Subarea of Shanghai. <i>Environ Sci Pollut Res Int</i> <b>2016</b> , <i>23</i> , 19201–19211, doi:10.1007/s11356-016-7066-6.                                                                   |
| 17. | Vahedian, M.; Khanjani, N.; Mirzaee, M.; Koolivand, A. Associations of Short-Term Exposure to Air Pollution with Respiratory Hospital Admissions in Arak, Iran. <i>J Environ Health Sci Eng</i> <b>2017</b> , <i>15</i> , 17, doi:10.1186/s40201-017-0277-z.                                                                                                     |

18. Wang, M.; Chen, J.; Zhang, Z.; Yu, P.; Gan, W.; Tan, Z.; Bao, J. Associations between Air Pollution and Outpatient Visits for Arrhythmia in Hangzhou, China. *BMC Public Health* **2020**, *20*, 1524, doi:10.1186/s12889-020-09628-y.
19. Wu, T.; Ma, Y.; Wu, X.; Bai, M.; Peng, Y.; Cai, W.; Wang, Y.; Zhao, J.; Zhang, Z. Association between Particulate Matter Air Pollution and Cardiovascular Disease Mortality in Lanzhou, China. *Environ Sci Pollut Res Int* **2019**, *26*, 15262–15272, doi:10.1007/s11356-019-04742-w.
20. Xia, X.; Zhang, A.; Liang, S.; Qi, Q.; Jiang, L.; Ye, Y. The Association between Air Pollution and Population Health Risk for Respiratory Infection: A Case Study of Shenzhen, China. *Int J Environ Res Public Health* **2017**, *14*, doi:10.3390/ijerph14090950.
21. Yap, J.; Ng, Y.; Yeo, K.K.; Sahlén, A.; Lam, C.S.P.; Lee, V.; Ma, S. Particulate Air Pollution on Cardiovascular Mortality in the Tropics: Impact on the Elderly. *Environ Health* **2019**, *18*, 34, doi:10.1186/s12940-019-0476-4.
22. Ye, D.; Klein, M.; Mulholland, J.A.; Russell, A.G.; Weber, R.; Edgerton, E.S.; Chang, H.H.; Sarnat, J.A.; Tolbert, P.E.; Ebelt Sarnat, S. Estimating Acute Cardiovascular Effects of Ambient PM<sub>2.5</sub> Metals. *Environ Health Perspect* **2018**, *126*, 027007, doi:10.1289/EHP2182.
23. Zhang, D.; Li, Y.; Chen, Q.; Jiang, Y.; Chu, C.; Ding, Y.; Yu, Y.; Fan, Y.; Shi, J.; Luo, Y.; et al. The Relationship between Air Quality and Respiratory Pathogens among Children in Suzhou City. *Ital J Pediatr* **2019**, *45*, 123, doi:10.1186/s13052-019-0702-2.
24. Zhang, Z.; Chai, P.; Wang, J.; Ye, Z.; Shen, P.; Lu, H.; Jin, M.; Gu, M.; Li, D.; Lin, H.; et al. Association of Particulate Matter Air Pollution and Hospital Visits for Respiratory Diseases: A Time-Series Study from China. *Environ Sci Pollut Res Int* **2019**, *26*, 12280–12287, doi:10.1007/s11356-019-04397-7.
25. Zhu, L.; Ge, X.; Chen, Y.; Zeng, X.; Pan, W.; Zhang, X.; Ben, S.; Yuan, Q.; Xin, J.; Shao, W.; et al. Short-Term Effects of Ambient Air Pollution and Childhood Lower Respiratory Diseases. *Sci Rep* **2017**, *7*, 4414, doi:10.1038/s41598-017-04310-7.
26. Blomberg, A.J.; Coull, B.A.; Jhun, I.; Vieira, C.L.Z.; Zanobetti, A.; Garshick, E.; Schwartz, J.; Koutrakis, P. Effect Modification of Ambient Particle Mortality by Radon: A Time Series Analysis in 108 U.S. Cities. *Journal of the Air & Waste Management Association* **2019**, *69*, 266–276, doi:10.1080/10962247.2018.1523071.
27. Bono, R.; Romanazzi, V.; Bellisario, V.; Tassinari, R.; Trucco, G.; Urbino, A.; Cassardo, C.; Siniscalco, C.; Marchetti, P.; Marcon, A. Air Pollution, Aeroallergens and Admissions to Pediatric Emergency Room for Respiratory Reasons in Turin, Northwestern Italy. *BMC Public Health* **2016**, *16*, 722, doi:10.1186/s12889-016-3376-3.
28. Cai, J.; Yu, S.; Pei, Y.; Peng, C.; Liao, Y.; Liu, N.; Ji, J.; Cheng, J. Association between Airborne Fine Particulate Matter and Residents' Cardiovascular Diseases, Ischemic Heart Disease and Cerebral Vascular Disease Mortality in Areas with Lighter Air Pollution in China. *IJERPH* **2018**, *15*, 1918, doi:10.3390/ijerph15091918.
29. Chang, Q.; Zhang, H.; Zhao, Y. Ambient Air Pollution and Daily Hospital Admissions for Respiratory System-Related Diseases in a Heavy Polluted City in Northeast China. *Environ Sci Pollut Res* **2020**, *27*, 10055–10064, doi:10.1007/s11356-020-07678-8.
30. Ferreira, T.; Forti, M.; de Freitas, C.; Nascimento, F.; Junger, W.; Gouveia, N. Effects of Particulate Matter and Its Chemical Constituents on Elderly Hospital Admissions Due to Circulatory and Respiratory Diseases. *IJERPH* **2016**, *13*, 947, doi:10.3390/ijerph13100947.
31. Guo, Y.; Gao, C.X.; Dennekamp, M.; Dimitriadis, C.; Straney, L.; Ikin, J.; Abramson, M.J. The Association of Coal Mine Fire Smoke with Hospital Emergency Presentations and Admissions: Time Series Analysis of Hazelwood Health Study. *Chemosphere* **2020**, *253*, 126667, doi:10.1016/j.chemosphere.2020.126667.
32. Jiang, Y.; Chen, J.; Wu, C.; Lin, X.; Zhou, Q.; Ji, S.; Yang, S.; Zhang, X.; Liu, B. Temporal Cross-Correlations between Air Pollutants and Outpatient Visits for Respiratory and Circulatory System Diseases in Fuzhou, China. *BMC Public Health* **2020**, *20*, 1131, doi:10.1186/s12889-020-08915-y.
33. Lin, H.; Ma, W.; Qiu, H.; Wang, X.; Trevathan, E.; Yao, Z.; Dong, G.-H.; Vaughn, M.G.; Qian, Z.; Tian, L. Using Daily Excessive Concentration Hours to Explore the Short-Term Mortality Effects of Ambient PM<sub>2.5</sub> in Hong Kong. *Environmental Pollution* **2017**, *229*, 896–901, doi:10.1016/j.envpol.2017.07.060.
34. Liu, L.; Liu, C.; Chen, R.; Zhou, Y.; Meng, X.; Hong, J.; Cao, L.; Lu, Y.; Dong, X.; Xia, M.; et al. Associations of Short-Term Exposure to Air Pollution and Emergency Department Visits for Pediatric Asthma in Shanghai, China. *Chemosphere* **2021**, *263*, 127856, doi:10.1016/j.chemosphere.2020.127856.
35. Luong, L.T.M.; Dang, T.N.; Thanh Huong, N.T.; Phung, D.; Tran, L.K.; Van Dung, D.; Thai, P.K. Particulate Air Pollution in Ho Chi Minh City and Risk of Hospital Admission for Acute Lower

- Respiratory Infection (ALRI) among Young Children. *Environmental Pollution* **2020**, 257, 113424, doi:10.1016/j.envpol.2019.113424.
36. Ma, Y.; Yue, L.; Liu, J.; He, X.; Li, L.; Niu, J.; Luo, B. Association of Air Pollution with Outpatient Visits for Respiratory Diseases of Children in an Ex-Heavily Polluted Northwestern City, China. *BMC Public Health* **2020**, 20, 816, doi:10.1186/s12889-020-08933-w.
37. Nayebare, S.R.; Aburizaiza, O.S.; Siddique, A.; Carpenter, D.O.; Arden Pope, C.; Mirza, H.M.; Zeb, J.; Aburiziza, A.J.; Khwaja, H.A. Fine Particles Exposure and Cardiopulmonary Morbidity in Jeddah: A Time-Series Analysis. *Science of The Total Environment* **2019**, 647, 1314–1322, doi:10.1016/j.scitotenv.2018.08.094.
38. Pearce, J.L.; Neelon, B.; Bozigar, M.; Hunt, K.J.; Commodore, A.; Vena, J. Associations between Multipollutant Day Types and Select Cardiorespiratory Outcomes in Columbia, South Carolina, 2002 to 2013. *Environmental Epidemiology* **2018**, 2, e030, doi:10.1097/EE9.0000000000000030.
39. Ribeiro, P.C.; Nascimento, L.F.C.; Almeida, A.A.; Targa, M. dos S.; Cesar, A.C.G. Fine Particulate Matter and Ischemic Heart Diseases Inrelation to Sex. An Ecological Time Series Study. *Sao Paulo Med. J.* **2019**, 137, 60–65, doi:10.1590/1516-3180.2018.0239040119.
40. Rodrigues, P.C. de O.; Pinheiro, S. de L.; Junger, W.; Ignotti, E.; Hacon, S. de S. Climatic Variability and Morbidity and Mortality Associated with Particulate Matter. *Rev Saude Publica* **2017**, 51, 91, doi:10.11606/S1518-8787.2017051006952.
41. Song, J.; Lu, M.; Zheng, L.; Liu, Y.; Xu, P.; Li, Y.; Xu, D.; Wu, W. Acute Effects of Ambient Air Pollution on Outpatient Children with Respiratory Diseases in Shijiazhuang, China. *BMC Pulm Med* **2018**, 18, 150, doi:10.1186/s12890-018-0716-3.
42. Strosnider, H.M.; Chang, H.H.; Darrow, L.A.; Liu, Y.; Vaidyanathan, A.; Strickland, M.J. Age-Specific Associations of Ozone and Fine Particulate Matter with Respiratory Emergency Department Visits in the United States. *Am J Respir Crit Care Med* **2019**, 199, 882–890, doi:10.1164/rccm.201806-1147OC.
43. Tian, Y.; Liu, H.; Wu, Y.; Si, Y.; Li, M.; Wu, Y.; Wang, X.; Wang, M.; Chen, L.; Wei, C.; et al. Ambient Particulate Matter Pollution and Adult Hospital Admissions for Pneumonia in Urban China: A National Time Series Analysis for 2014 through 2017. *PLoS Med* **2019**, 16, e1003010, doi:10.1371/journal.pmed.1003010.
44. Wang, X.; Xu, Z.; Su, H.; Ho, H.C.; Song, Y.; Zheng, H.; Hossain, M.Z.; Khan, M.A.; Bogale, D.; Zhang, H.; et al. Ambient Particulate Matter (PM<sub>1</sub>, PM<sub>2.5</sub>, PM<sub>10</sub>) and Childhood Pneumonia: The Smaller Particle, the Greater Short-Term Impact? *Science of The Total Environment* **2021**, 772, 145509, doi:10.1016/j.scitotenv.2021.145509.
45. Wang, Z.; Zhou, Y.; Zhang, Y.; Huang, X.; Duan, X.; Chen, D.; Ou, Y.; Tang, L.; Liu, S.; Hu, W.; et al. Association of Change in Air Quality with Hospital Admission for Acute Exacerbation of Chronic Obstructive Pulmonary Disease in Guangdong, China: A Province-Wide Ecological Study. *Ecotoxicology and Environmental Safety* **2021**, 208, 111590, doi:10.1016/j.ecoenv.2020.111590.
46. Xu, J.; Geng, W.; Geng, X.; Cui, L.; Ding, T.; Xiao, C.; Zhang, J.; Tang, J.; Zhai, J. Study on the Association between Ambient Air Pollution and Daily Cardiovascular Death in Hefei, China. *Environ Sci Pollut Res* **2020**, 27, 547–561, doi:10.1007/s11356-019-06867-4.
47. Yang, H.; Yan, C.; Li, M.; Zhao, L.; Long, Z.; Fan, Y.; Zhang, Z.; Chen, R.; Huang, Y.; Lu, C.; et al. Short Term Effects of Air Pollutants on Hospital Admissions for Respiratory Diseases among Children: A Multi-City Time-Series Study in China. *International Journal of Hygiene and Environmental Health* **2021**, 231, 113638, doi:10.1016/j.ijheh.2020.113638.
48. Yu, Y.; Yao, S.; Dong, H.; Ji, M.; Chen, Z.; Li, G.; Yao, X.; Wang, S.-L.; Zhang, Z. Short-Term Effects of Ambient Air Pollutants and Myocardial Infarction in Changzhou, China. *Environ Sci Pollut Res* **2018**, 25, 22285–22293, doi:10.1007/s11356-018-2250-5.
49. Zhang, Y.; Wu, Z.; Gou, K.; Wang, R.; Wang, J. The Impact of Air Pollution on Outpatient Visits of Children with Asthma in Xi'an, China. *Wilderness Environ Med* **2021**, 32, 47–54, doi:10.1016/j.wem.2020.11.006.
50. Zhao, Y.; Wang, S.; Lang, L.; Huang, C.; Ma, W.; Lin, H. Ambient Fine and Coarse Particulate Matter Pollution and Respiratory Morbidity in Dongguan, China. *Environmental Pollution* **2017**, 222, 126–131, doi:10.1016/j.envpol.2016.12.070.
51. Zhou, H.; Geng, H.; Dong, C.; Bai, T. The Short-Term Harvesting Effects of Ambient Particulate Matter on Mortality in Taiyuan Elderly Residents: A Time-Series Analysis with a Generalized Additive Distributed Lag Model. *Ecotoxicology and Environmental Safety* **2021**, 207, 111235, doi:10.1016/j.ecoenv.2020.111235.

52. Zuo, B.; Liu, C.; Chen, R.; Kan, H.; Sun, J.; Zhao, J.; Wang, C.; Sun, Q.; Bai, H. Associations between Short-Term Exposure to Fine Particulate Matter and Acute Exacerbation of Asthma in Yancheng, China. *Chemosphere* **2019**, *237*, 124497, doi:10.1016/j.chemosphere.2019.124497.
53. Bai, L.; Su, X.; Zhao, D.; Zhang, Y.; Cheng, Q.; Zhang, H.; Wang, S.; Xie, M.; Su, H. Exposure to Traffic-Related Air Pollution and Acute Bronchitis in Children: Season and Age as Modifiers. *J Epidemiol Community Health* **2018**, *72*, 426–433, doi:10.1136/jech-2017-209948.
54. Chen, R.; Yin, P.; Meng, X.; Liu, C.; Wang, L.; Xu, X.; Ross, J.A.; Tse, L.A.; Zhao, Z.; Kan, H.; et al. Fine Particulate Air Pollution and Daily Mortality. A Nationwide Analysis in 272 Chinese Cities. *Am J Respir Crit Care Med* **2017**, *196*, 73–81, doi:10.1164/rccm.201609-1862OC.
55. Gong, T.; Sun, Z.; Zhang, X.; Zhang, Y.; Wang, S.; Han, L.; Zhao, D.; Ding, D.; Zheng, C. Associations of Black Carbon and PM<sub>2.5</sub> with Daily Cardiovascular Mortality in Beijing, China. *Atmospheric Environment* **2019**, *214*, 116876, doi:10.1016/j.atmosenv.2019.116876.
56. Guo, P.; Wang, Y.; Feng, W.; Wu, J.; Fu, C.; Deng, H.; Huang, J.; Wang, L.; Zheng, M.; Liu, H. Ambient Air Pollution and Risk for Ischemic Stroke: A Short-Term Exposure Assessment in South China. *IJERPH* **2017**, *14*, 1091, doi:10.3390/ijerph14091091.
57. Guo, P.; Feng, W.; Zheng, M.; Lv, J.; Wang, L.; Liu, J.; Zhang, Y.; Luo, G.; Zhang, Y.; Deng, C.; et al. Short-Term Associations of Ambient Air Pollution and Cause-Specific Emergency Department Visits in Guangzhou, China. *Science of The Total Environment* **2018**, *613–614*, 306–313, doi:10.1016/j.scitotenv.2017.09.102.
58. Hsu, W.-H.; Hwang, S.-A.; Kinney, P.L.; Lin, S. Seasonal and Temperature Modifications of the Association between Fine Particulate Air Pollution and Cardiovascular Hospitalization in New York State. *Science of The Total Environment* **2017**, *578*, 626–632, doi:10.1016/j.scitotenv.2016.11.008.
59. Kwon, O.K.; Kim, S.-H.; Kang, S.-H.; Cho, Y.; Oh, I.-Y.; Yoon, C.-H.; Kim, S.-Y.; Kim, O.-J.; Choi, E.-K.; Youn, T.-J.; et al. Association of Short- and Long-Term Exposure to Air Pollution with Atrial Fibrillation. *Eur J Prev Cardiol* **2019**, *26*, 1208–1216, doi:10.1177/2047487319835984.
60. Li, D.; Wang, J.; Zhang, Z.; Shen, P.; Zheng, P.; Jin, M.; Lu, H.; Lin, H.; Chen, K. Effects of Air Pollution on Hospital Visits for Pneumonia in Children: A Two-Year Analysis from China. *Environ Sci Pollut Res* **2018**, *25*, 10049–10057, doi:10.1007/s11356-018-1192-2.
61. Li, J.; Zhang, X.; Yin, P.; Wang, L.; Zhou, M. Ambient Fine Particulate Matter Pollution and Years of Life Lost from Cardiovascular Diseases in 48 Large Chinese Cities: Association, Effect Modification, and Additional Life Gain. *Science of The Total Environment* **2020**, *735*, 139413, doi:10.1016/j.scitotenv.2020.139413.
62. Li, M.; Tang, J.; Yang, H.; Zhao, L.; Liu, Y.; Xu, H.; Fan, Y.; Hong, J.; Long, Z.; Li, X.; et al. Short-Term Exposure to Ambient Particulate Matter and Outpatient Visits for Respiratory Diseases among Children: A Time-Series Study in Five Chinese Cities. *Chemosphere* **2021**, *263*, 128214, doi:10.1016/j.chemosphere.2020.128214.
63. Liang, H.; Qiu, H.; Tian, L. Short-Term Effects of Fine Particulate Matter on Acute Myocardial Infraction Mortality and Years of Life Lost: A Time Series Study in Hong Kong. *Science of The Total Environment* **2018**, *615*, 558–563, doi:10.1016/j.scitotenv.2017.09.266.
64. Lin, H.; Ratnapradipa, K.; Wang, X.; Zhang, Y.; Xu, Y.; Yao, Z.; Dong, G.; Liu, T.; Clark, J.; Dick, R.; et al. Hourly Peak Concentration Measuring the PM<sub>2.5</sub>-Mortality Association: Results from Six Cities in the Pearl River Delta Study. *Atmospheric Environment* **2017**, *161*, 27–33, doi:10.1016/j.atmosenv.2017.04.015.
65. Liu, C.; Liu, Y.; Zhou, Y.; Feng, A.; Wang, C.; Shi, T. Short-Term Effect of Relatively Low Level Air Pollution on Outpatient Visit in Shennongjia, China. *Environmental Pollution* **2019**, *245*, 419–426, doi:10.1016/j.envpol.2018.10.120.
66. Liu, M.; Xue, X.; Zhou, B.; Zhang, Y.; Sun, B.; Chen, J.; Li, X. Population Susceptibility Differences and Effects of Air Pollution on Cardiovascular Mortality: Epidemiological Evidence from a Time-Series Study. *Environ Sci Pollut Res* **2019**, *26*, 15943–15952, doi:10.1007/s11356-019-04960-2.
67. Luo, L.; Zhang, Y.; Jiang, J.; Luan, H.; Yu, C.; Nan, P.; Luo, B.; You, M. Short-Term Effects of Ambient Air Pollution on Hospitalization for Respiratory Disease in Taiyuan, China: A Time-Series Analysis. *IJERPH* **2018**, *15*, 2160, doi:10.3390/ijerph15102160.
68. Qiu, H.; Yu, H.; Wang, L.; Zhu, X.; Chen, M.; Zhou, L.; Deng, R.; Zhang, Y.; Pu, X.; Pan, J. The Burden of Overall and Cause-Specific Respiratory Morbidity Due to Ambient Air Pollution in Sichuan Basin, China: A Multi-City Time-Series Analysis. *Environmental Research* **2018**, *167*, 428–436, doi:10.1016/j.envres.2018.08.011.

69. Qu, F.; Liu, F.; Zhang, H.; Chao, L.; Guan, J.; Li, R.; Yu, F.; Yan, X. Comparison of Air Pollutant-Related Hospitalization Burden from AECOPD in Shijiazhuang, China, between Heating and Non-Heating Season. *Environ Sci Pollut Res* **2019**, *26*, 31225–31233, doi:10.1007/s11356-019-06242-3.
70. Rodríguez-Villamizar, L.A.; Rojas-Roa, N.Y.; Fernández-Niño, J.A. Short-Term Joint Effects of Ambient Air Pollutants on Emergency Department Visits for Respiratory and Circulatory Diseases in Colombia, 2011–2014. *Environmental Pollution* **2019**, *248*, 380–387, doi:10.1016/j.envpol.2019.02.028.
71. Solimini, A.; Renzi, M. Association between Air Pollution and Emergency Room Visits for Atrial Fibrillation. *IJERPH* **2017**, *14*, 661, doi:10.3390/ijerph14060661.
72. Sui, X.; Zhang, J.; Zhang, Q.; Sun, S.; Lei, R.; Zhang, C.; Cheng, H.; Ding, L.; Ding, R.; Xiao, C.; et al. The Short-Term Effect of PM<sub>2.5</sub>/O<sub>3</sub> on Daily Mortality from 2013 to 2018 in Hefei, China. *Environ Geochem Health* **2021**, *43*, 153–169, doi:10.1007/s10653-020-00689-x.
73. Tian, Y.; Liu, H.; Wu, Y.; Si, Y.; Song, J.; Cao, Y.; Li, M.; Wu, Y.; Wang, X.; Chen, L.; et al. Association between Ambient Fine Particulate Pollution and Hospital Admissions for Cause Specific Cardiovascular Disease: Time Series Study in 184 Major Chinese Cities. *BMJ* **2019**, l6572, doi:10.1136/bmj.l6572.
74. Wang, Y.; Zu, Y.; Huang, L.; Zhang, H.; Wang, C.; Hu, J. Associations between Daily Outpatient Visits for Respiratory Diseases and Ambient Fine Particulate Matter and Ozone Levels in Shanghai, China. *Environmental Pollution* **2018**, *240*, 754–763, doi:10.1016/j.envpol.2018.05.029.
75. Wang, Z.; Zhou, Y.; Zhang, Y.; Huang, X.; Duan, X.; Ou, Y.; Liu, S.; Hu, W.; Liao, C.; Zheng, Y.; et al. Association of Hospital Admission for Bronchiectasis with Air Pollution: A Province-Wide Time-Series Study in Southern China. *International Journal of Hygiene and Environmental Health* **2021**, *231*, 113654, doi:10.1016/j.ijheh.2020.113654.
76. Yao, C.; Wang, Y.; Williams, C.; Xu, C.; Kartsonaki, C.; Lin, Y.; Zhang, P.; Yin, P.; Lam, K.B.H. The Association between High Particulate Matter Pollution and Daily Cause-Specific Hospital Admissions: A Time-Series Study in Yichang, China. *Environ Sci Pollut Res* **2020**, *27*, 5240–5250, doi:10.1007/s11356-019-06734-2.
77. Yoo, S.-E.; Park, J.-S.; Lee, S.H.; Park, C.-H.; Lee, C.-W.; Lee, S.-B.; Yu, S.D.; Kim, S.-Y.; Kim, H. Comparison of Short-Term Associations between PM<sub>2.5</sub> Components and Mortality across Six Major Cities in South Korea. *IJERPH* **2019**, *16*, 2872, doi:10.3390/ijerph16162872.
78. Zheng, P.; Wang, J.; Zhang, Z.; Shen, P.; Chai, P.; Li, D.; Jin, M.; Tang, M.-L.; Lu, H.; Lin, H.; et al. Air Pollution and Hospital Visits for Acute Upper and Lower Respiratory Infections among Children in Ningbo, China: A Time-Series Analysis. *Environ Sci Pollut Res* **2017**, *24*, 18860–18869, doi:10.1007/s11356-017-9279-8.
79. Amsalu, E.; Wang, T.; Li, H.; Liu, Y.; Wang, A.; Liu, X.; Tao, L.; Luo, Y.; Zhang, F.; Yang, X.; et al. Acute Effects of Fine Particulate Matter (PM<sub>2.5</sub>) on Hospital Admissions for Cardiovascular Disease in Beijing, China: A Time-Series Study. *Environ Health* **2019**, *18*, 70, doi:10.1186/s12940-019-0506-2.
80. Atkinson, R.W.; Samoli, E.; Analitis, A.; Fuller, G.W.; Green, D.C.; Anderson, H.R.; Purdie, E.; Dunster, C.; Aitlhadj, L.; Kelly, F.J.; et al. Short-Term Associations between Particle Oxidative Potential and Daily Mortality and Hospital Admissions in London. *International Journal of Hygiene and Environmental Health* **2016**, *219*, 566–572, doi:10.1016/j.ijheh.2016.06.004.
81. Borsi, S.H.; Khanjani, N.; Nejad, H.Y.; Riahi, A.; Sekhavatpour, Z.; Raji, H.; Dastoorpoor, M. Air Pollution and Hospital Admissions Due to Deep Vein Thrombosis (DVT) in Ahvaz, Iran. *Heliyon* **2020**, *6*, e04814, doi:10.1016/j.heliyon.2020.e04814.
82. Cai, J.; Peng, C.; Yu, S.; Pei, Y.; Liu, N.; Wu, Y.; Fu, Y.; Cheng, J. Association between PM<sub>2.5</sub> Exposure and All-Cause, Non-Accidental, Accidental, Different Respiratory Diseases, Sex and Age Mortality in Shenzhen, China. *IJERPH* **2019**, *16*, 401, doi:10.3390/ijerph16030401.
83. César, A.C.G.; Nascimento, L.F. Coarse Particles and Hospital Admissions Due to Respiratory Diseases in Children. An Ecological Time Series Study. *Sao Paulo Med. J.* **2018**, *136*, 245–250, doi:10.1590/1516-3180.2017.0362080218.
84. Chai, G.; He, H.; Sha, Y.; Zhai, G.; Zong, S. Effect of PM<sub>2.5</sub> on Daily Outpatient Visits for Respiratory Diseases in Lanzhou, China. *Science of The Total Environment* **2019**, *649*, 1563–1572, doi:10.1016/j.scitotenv.2018.08.384.
85. Chen, C.; Zhu, P.; Lan, L.; Zhou, L.; Liu, R.; Sun, Q.; Ban, J.; Wang, W.; Xu, D.; Li, T. Short-Term Exposures to PM<sub>2.5</sub> and Cause-Specific Mortality of Cardiovascular Health in China. *Environmental Research* **2018**, *161*, 188–194, doi:10.1016/j.envres.2017.10.046.

86. Chen, R.; Yin, P.; Meng, X.; Wang, L.; Liu, C.; Niu, Y.; Liu, Y.; Liu, J.; Qi, J.; You, J.; et al. Associations between Coarse Particulate Matter Air Pollution and Cause-Specific Mortality: A Nationwide Analysis in 272 Chinese Cities. *Environ Health Perspect* **2019**, *127*, 017008, doi:10.1289/EHP2711.
87. Cheng, H.; Zhu, F.; Lei, R.; Shen, C.; Liu, J.; Yang, M.; Ding, R.; Cao, J. Associations of Ambient PM<sub>2.5</sub> and O<sub>3</sub> with Cardiovascular Mortality: A Time-Series Study in Hefei, China. *Int J Biometeorol* **2019**, *63*, 1437–1447, doi:10.1007/s00484-019-01766-2.
88. Davila Cordova, J.E.; Tapia Aguirre, V.; Vasquez Apestegui, V.; Ordoñez Ibarguen, L.; Vu, B.N.; Steenland, K.; Gonzales, G.F. Association of PM<sub>2.5</sub> Concentration with Health Center Outpatient Visits for Respiratory Diseases of Children under 5 Years Old in Lima, Peru. *Environ Health* **2020**, *19*, 7, doi:10.1186/s12940-020-0564-5.
89. Gao, N.; Li, C.; Ji, J.; Yang, Y.; Wang, S.; Tian, X.; Xu, K.-F. Short-Term Effects of Ambient Air Pollution on Chronic Obstructive Pulmonary Disease Admissions in Beijing, China (2013–2017). *Int J Chron Obstruct Pulmon Dis* **2019**, *14*, 297–309, doi:10.2147/COPD.S188900.
90. Gu, J.; Shi, Y.; Zhu, Y.; Chen, N.; Wang, H.; Zhang, Z.; Chen, T. Ambient Air Pollution and Cause-Specific Risk of Hospital Admission in China: A Nationwide Time-Series Study. *PLoS Med* **2020**, *17*, e1003188, doi:10.1371/journal.pmed.1003188.
91. Hsu, C.-Y.; Chiang, H.-C.; Chen, M.-J.; Chuang, C.-Y.; Tsen, C.-M.; Fang, G.-C.; Tsai, Y.-I.; Chen, N.-T.; Lin, T.-Y.; Lin, S.-L.; et al. Ambient PM<sub>2.5</sub> in the Residential Area near Industrial Complexes: Spatiotemporal Variation, Source Apportionment, and Health Impact. *Science of The Total Environment* **2017**, *590–591*, 204–214, doi:10.1016/j.scitotenv.2017.02.212.
92. Kollanus, V.; Tiittanen, P.; Niemi, J.V.; Lanki, T. Effects of Long-Range Transported Air Pollution from Vegetation Fires on Daily Mortality and Hospital Admissions in the Helsinki Metropolitan Area, Finland. *Environmental Research* **2016**, *151*, 351–358, doi:10.1016/j.envres.2016.08.003.
93. Lanzinger, S.; Schneider, A.; Breitner, S.; Stafoggia, M.; Erzen, I.; Dostal, M.; Pastorkova, A.; Bastian, S.; Cyrus, J.; Zscheppang, A.; et al. Associations between Ultrafine and Fine Particles and Mortality in Five Central European Cities — Results from the UFIRES Study. *Environment International* **2016**, *88*, 44–52, doi:10.1016/j.envint.2015.12.006.
94. Lin, H.; Ma, W.; Qiu, H.; Vaughn, M.G.; Nelson, E.J.; Qian, Z.; Tian, L. Is Standard Deviation of Daily PM<sub>2.5</sub> Concentration Associated with Respiratory Mortality? *Environmental Pollution* **2016**, *216*, 208–214, doi:10.1016/j.envpol.2016.05.068.
95. Lin, H.; Tao, J.; Du, Y.; Liu, T.; Qian, Z.; Tian, L.; Di, Q.; Rutherford, S.; Guo, L.; Zeng, W.; et al. Particle Size and Chemical Constituents of Ambient Particulate Pollution Associated with Cardiovascular Mortality in Guangzhou, China. *Environmental Pollution* **2016**, *208*, 758–766, doi:10.1016/j.envpol.2015.10.056.
96. Liu, G.; Sun, B.; Yu, L.; Chen, J.; Han, B.; Liu, B.; Chen, J. Short-Term Exposure to Ambient Air Pollution and Daily Atherosclerotic Heart Disease Mortality in a Cool Climate. *Environ Sci Pollut Res* **2019**, *26*, 23603–23614, doi:10.1007/s11356-019-05565-5.
97. Mokoena, K.K.; Ethan, C.J.; Yu, Y.; Shale, K.; Liu, F. Ambient Air Pollution and Respiratory Mortality in Xi'an, China: A Time-Series Analysis. *Respir Res* **2019**, *20*, 139, doi:10.1186/s12931-019-1117-8.
98. Pato, N.V.; Nascimento, L.F.C.; Mantovani, K.C.C.; Vieira, L.C.P.F.S.; Moreira, D.S. Exposure to Fine Particulate Matter and Hospital Admissions Due to Pneumonia: Effects on the Number of Hospital Admissions and Its Costs. *Rev Assoc Med Bras (1992)* **2016**, *62*, 342–346, doi:10.1590/1806-9282.62.04.342.
99. Pothirat, C.; Chaiwong, W.; Liwsrisakun, C.; Bumroongkit, C.; Deesomchok, A.; Theerakittikul, T.; Limsukon, A.; Tajarennmuang, P.; Phetsuk, N. Acute Effects of Air Pollutants on Daily Mortality and Hospitalizations Due to Cardiovascular and Respiratory Diseases. *J. Thorac. Dis* **2019**, *11*, 3070–3083, doi:10.21037/jtd.2019.07.37.
100. Pothirat, C.; Chaiwong, W.; Liwsrisakun, C.; Bumroongkit, C.; Deesomchok, A.; Theerakittikul, T.; Limsukon, A.; Tajarennmuang, P.; Phetsuk, N. The Short-Term Associations of Particular Matters on Non-Accidental Mortality and Causes of Death in Chiang Mai, Thailand: A Time Series Analysis Study between 2016–2018. *International Journal of Environmental Health Research* **2021**, *31*, 538–547, doi:10.1080/09603123.2019.1673883.
101. Pu, X.; Wang, L.; Chen, L.; Pan, J.; Tang, L.; Wen, J.; Qiu, H. Differential Effects of Size-Specific Particulate Matter on Lower Respiratory Infections in Children: A Multi-City Time-Series Analysis in Sichuan, China. *Environmental Research* **2021**, *193*, 110581, doi:10.1016/j.envres.2020.110581.
102. Qiu, X.; Wei, Y.; Wang, Y.; Di, Q.; Sofer, T.; Awad, Y.A.; Schwartz, J. Inverse Probability Weighted Distributed Lag Effects of Short-Term Exposure to PM<sub>2.5</sub> and Ozone on CVD Hospitalizations in New

- England Medicare Participants - Exploring the Causal Effects. *Environmental Research* **2020**, *182*, 109095, doi:10.1016/j.envres.2019.109095.
103. Qu, Y.; Pan, Y.; Niu, H.; He, Y.; Li, M.; Li, L.; Liu, J.; Li, B. Short-Term Effects of Fine Particulate Matter on Non-Accidental and Circulatory Diseases Mortality: A Time Series Study among the Elder in Changchun. *PLoS ONE* **2018**, *13*, e0209793, doi:10.1371/journal.pone.0209793.
  104. Sun, Q.; Liu, C.; Chen, R.; Wang, C.; Li, J.; Sun, J.; Kan, H.; Cao, J.; Bai, H. Association of Fine Particulate Matter on Acute Exacerbation of Chronic Obstructive Pulmonary Disease in Yancheng, China. *Science of The Total Environment* **2019**, *650*, 1665–1670, doi:10.1016/j.scitotenv.2018.09.278.
  105. Teng, B.; Zhang, X.; Yi, C.; Zhang, Y.; Ye, S.; Wang, Y.; Tong, D.; Lu, B. The Association between Ambient Air Pollution and Allergic Rhinitis: Further Epidemiological Evidence from Changchun, Northeastern China. *IJERPH* **2017**, *14*, 226, doi:10.3390/ijerph14030226.
  106. Wang, C.; Feng, L.; Chen, K. The Impact of Ambient Particulate Matter on Hospital Outpatient Visits for Respiratory and Circulatory System Disease in an Urban Chinese Population. *Science of The Total Environment* **2019**, *666*, 672–679, doi:10.1016/j.scitotenv.2019.02.256.
  107. Yu, Y.; Yao, S.; Dong, H.; Wang, L.; Wang, C.; Ji, X.; Ji, M.; Yao, X.; Zhang, Z. Association between Short-Term Exposure to Particulate Matter Air Pollution and Cause-Specific Mortality in Changzhou, China. *Environmental Research* **2019**, *170*, 7–15, doi:10.1016/j.envres.2018.11.041.
  108. Zhu, J.; Zhang, X.; Zhang, X.; Dong, M.; Wu, J.; Dong, Y.; Chen, R.; Ding, X.; Huang, C.; Zhang, Q.; et al. The Burden of Ambient Air Pollution on Years of Life Lost in Wuxi, China, 2012–2015: A Time-Series Study Using a Distributed Lag Non-Linear Model. *Environmental Pollution* **2017**, *224*, 689–697, doi:10.1016/j.envpol.2017.02.053.
  109. Bao, H.; Dong, J.; Liu, X.; Tan, E.; Shu, J.; Li, S. Association between Ambient Particulate Matter and Hospital Outpatient Visits for Chronic Obstructive Pulmonary Disease in Lanzhou, China. *Environ Sci Pollut Res* **2020**, *27*, 22843–22854, doi:10.1007/s11356-020-08797-y.
  110. Bi, J.; D'Souza, R.R.; Rich, D.Q.; Hopke, P.K.; Russell, A.G.; Liu, Y.; Chang, H.H.; Ebel, S. Temporal Changes in Short-Term Associations between Cardiorespiratory Emergency Department Visits and PM<sub>2.5</sub> in Los Angeles, 2005 to 2016. *Environmental Research* **2020**, *190*, 109967, doi:10.1016/j.envres.2020.109967.
  111. Chang, J.-H.; Hsu, S.-C.; Bai, K.-J.; Huang, S.-K.; Hsu, C.-W. Association of Time-Serial Changes in Ambient Particulate Matters (PMs) with Respiratory Emergency Cases in Taipei's Wenshan District. *PLoS ONE* **2017**, *12*, e0181106, doi:10.1371/journal.pone.0181106.
  112. Chen, C.; Xu, D.; He, M.Z.; Wang, Y.; Du, Z.; Du, Y.; Qian, Y.; Ji, D.; Li, T. Fine Particle Constituents and Mortality: A Time-Series Study in Beijing, China. *Environ. Sci. Technol.* **2018**, *52*, 11378–11386, doi:10.1021/acs.est.8b00424.
  113. Chen, D.; Mayvaneh, F.; Baaghdeh, M.; Entezari, A.; Ho, H.C.; Xiang, Q.; Jiao, A.; Zhang, F.; Hu, K.; Chen, G.; et al. Utilizing Daily Excessive Concentration Hours to Estimate Cardiovascular Mortality and Years of Life Lost Attributable to Fine Particulate Matter in Tehran, Iran. *Science of The Total Environment* **2020**, *703*, 134909, doi:10.1016/j.scitotenv.2019.134909.
  114. Fang, X.; Fang, B.; Wang, C.; Xia, T.; Bottai, M.; Fang, F.; Cao, Y. Comparison of Frequentist and Bayesian Generalized Additive Models for Assessing the Association Between Daily Exposure to Fine Particles and Respiratory Mortality: A Simulation Study. *IJERPH* **2019**, *16*, 746, doi:10.3390/ijerph16050746.
  115. GUO, J.; MA, M.; XIAO, C.; ZHANG, C.; CHEN, J.; LIN, H.; DU, Y.; LIU, M. Association of Air Pollution and Mortality of Acute Lower Respiratory Tract Infections in Shenyang, China: A Time Series Analysis Study. *Iran J Public Health* **2018**, *47*, 1261–1271.
  116. Huang, F.; Chen, R.; Shen, Y.; Kan, H.; Kuang, X. The Impact of the 2013 Eastern China Smog on Outpatient Visits for Coronary Heart Disease in Shanghai, China. *IJERPH* **2016**, *13*, 627, doi:10.3390/ijerph13070627.
  117. Hwang, S.-H.; Lee, J.Y.; Yi, S.-M.; Kim, H. Associations of Particulate Matter and Its Components with Emergency Room Visits for Cardiovascular and Respiratory Diseases. *PLoS ONE* **2017**, *12*, e0183224, doi:10.1371/journal.pone.0183224.
  118. Jiang, J.; Niu, Y.; Liu, C.; Chen, R.; Cao, J.; Kan, H.; Cheng, Y. Short-Term Exposure to Coarse Particulate Matter and Outpatient Visits for Cardiopulmonary Disease in a Chinese City. *Ecotoxicology and Environmental Safety* **2020**, *199*, 110686, doi:10.1016/j.ecoenv.2020.110686.
  119. Kuźma, Ł.; Struniawski, K.; Pogorzelski, S.; Bachórzewska-Gajewska, H.; Dobrzycki, S. Gender Differences in Association between Air Pollution and Daily Mortality in the Capital of the Green

- Lungs of Poland–Population-Based Study with 2,953,000 Person-Years of Follow-Up. *JCM* **2020**, *9*, 2351, doi:10.3390/jcm9082351.
120. Li, Y.R.; Xiao, C.C.; Li, J.; Tang, J.; Geng, X.Y.; Cui, L.J.; Zhai, J.X. Association between Air Pollution and Upper Respiratory Tract Infection in Hospital Outpatients Aged 0–14 Years in Hefei, China: A Time Series Study. *Public Health* **2018**, *156*, 92–100, doi:10.1016/j.puhe.2017.12.006.
121. Lin, H.; Tao, J.; Qian, Z. (Min); Ruan, Z.; Xu, Y.; Hang, J.; Xu, X.; Liu, T.; Guo, Y.; Zeng, W.; et al. Shipping Pollution Emission Associated with Increased Cardiovascular Mortality: A Time Series Study in Guangzhou, China. *Environmental Pollution* **2018**, *241*, 862–868, doi:10.1016/j.envpol.2018.06.027.
122. Liu, Y.; Xie, S.; Yu, Q.; Huo, X.; Ming, X.; Wang, J.; Zhou, Y.; Peng, Z.; Zhang, H.; Cui, X.; et al. Short-Term Effects of Ambient Air Pollution on Pediatric Outpatient Visits for Respiratory Diseases in Yichang City, China. *Environmental Pollution* **2017**, *227*, 116–124, doi:10.1016/j.envpol.2017.04.029.
123. Liu, Y.; Cui, L.; Hou, L.; Yu, C.; Tao, N.; Liu, J.; Li, Y.; Zhou, C.; Yang, G.; Li, H. Ambient Air Pollution Exposures and Newly Diagnosed Pulmonary Tuberculosis in Jinan, China: A Time Series Study. *Sci Rep* **2018**, *8*, 17411, doi:10.1038/s41598-018-35411-6.
124. Mokoena, K.K.; Ethan, C.J.; Yu, Y.; Shale, K.; Fan, Y.; Liu, F.; Rong, J. The Effect of Ambient Air Pollution on Circulatory Mortality: A Short-Term Exposure Assessment in Xi'an, China. *Environ Sci Pollut Res* **2019**, *26*, 22512–22521, doi:10.1007/s11356-019-05463-w.
125. Nascimento, L.F.C.; Vieira, L.C.P.F.; Mantovani, K.C.C.; Moreira, D.S. Air Pollution and Respiratory Diseases: Ecological Time Series. *Sao Paulo Med. J.* **2016**, *134*, 315–321, doi:10.1590/1516-3180.2015.0237250216.
126. Rodríguez-Villamizar, L.; Rojas-Roa, N.; Blanco-Becerra, L.; Herrera-Galindo, V.; Fernández-Niño, J. Short-Term Effects of Air Pollution on Respiratory and Circulatory Morbidity in Colombia 2011–2014: A Multi-City, Time-Series Analysis. *IJERPH* **2018**, *15*, 1610, doi:10.3390/ijerph15081610.
127. Sacramento, D.S.; Martins, L.C.; Arbex, M.A.; Pamplona, Y. de A.P. Atmospheric Pollution and Hospitalization for Cardiovascular and Respiratory Diseases in the City of Manaus from 2008 to 2012. *The Scientific World Journal* **2020**, *2020*, 1–8, doi:10.1155/2020/8458359.
128. Slama, A.; Śliwczynski, A.; Woźnica, J.; Zdrolik, M.; Wiśnicki, B.; Kubajek, J.; Turzańska-Wieczorek, O.; Gozdowski, D.; Wierzba, W.; Franek, E. Impact of Air Pollution on Hospital Admissions with a Focus on Respiratory Diseases: A Time-Series Multi-City Analysis. *Environ Sci Pollut Res* **2019**, *26*, 16998–17009, doi:10.1007/s11356-019-04781-3.
129. Slama, A.; Śliwczynski, A.; Woźnica-Pyzikiewicz, J.; Zdrolik, M.; Wiśnicki, B.; Kubajek, J.; Turzańska-Wieczorek, O.; Studnicki, M.; Wierzba, W.; Franek, E. The Short-Term Effects of Air Pollution on Respiratory Disease Hospitalizations in 5 Cities in Poland: Comparison of Time-Series and Case-Crossover Analyses. *Environ Sci Pollut Res Int* **2020**, *27*, 24582–24590, doi:10.1007/s11356-020-08542-5.
130. Tapia, V.; Steenland, K.; Sarnat, S.E.; Vu, B.; Liu, Y.; Sánchez-Ccoyllo, O.; Vasquez, V.; Gonzales, G.F. Time-Series Analysis of Ambient PM<sub>2.5</sub> and Cardiorespiratory Emergency Room Visits in Lima, Peru during 2010–2016. *J Expo Sci Environ Epidemiol* **2020**, *30*, 680–688, doi:10.1038/s41370-019-0189-3.
131. Tian, Q.; Li, M.; Montgomery, S.; Fang, B.; Wang, C.; Xia, T.; Cao, Y. Short-Term Associations of Fine Particulate Matter and Synoptic Weather Types with Cardiovascular Mortality: An Ecological Time-Series Study in Shanghai, China. *IJERPH* **2020**, *17*, 1111, doi:10.3390/ijerph17031111.
132. Vahedian, M.; Khanjani, N.; Mirzaee, M.; Koolivand, A. Ambient Air Pollution and Daily Hospital Admissions for Cardiovascular Diseases in Arak, Iran. *ARYA Atheroscler* **2017**, *13*, 117–134.
133. Wang, C.; Hao, L.; Liu, C.; Chen, R.; Wang, W.; Chen, Y.; Yang, Y.; Meng, X.; Fu, Q.; Ying, Z.; et al. Associations between Fine Particulate Matter Constituents and Daily Cardiovascular Mortality in Shanghai, China. *Ecotoxicology and Environmental Safety* **2020**, *191*, 110154, doi:10.1016/j.ecoenv.2019.110154.
134. Wang, H.; Lu, F.; Guo, M.; Fan, W.; Ji, W.; Dong, Z. Associations between PM<sub>1</sub> Exposure and Daily Emergency Department Visits in 19 Hospitals, Beijing. *Science of The Total Environment* **2021**, *755*, 142507, doi:10.1016/j.scitotenv.2020.142507.
135. Yitshak-Sade, M.; Bobb, J.F.; Schwartz, J.D.; Kloog, I.; Zanobetti, A. The Association between Short and Long-Term Exposure to PM<sub>2.5</sub> and Temperature and Hospital Admissions in New England and the Synergistic Effect of the Short-Term Exposures. *Science of The Total Environment* **2018**, *639*, 868–875, doi:10.1016/j.scitotenv.2018.05.181.
136. Zhang, D.; Tian, Y.; Zhang, Y.; Cao, Y.; Wang, Q.; Hu, Y. Fine Particulate Air Pollution and Hospital Utilization for Upper Respiratory Tract Infections in Beijing, China. *IJERPH* **2019**, *16*, 533, doi:10.3390/ijerph16040533.

137. Zhang, F.; Zhang, H.; Wu, C.; Zhang, M.; Feng, H.; Li, D.; Zhu, W. Acute Effects of Ambient Air Pollution on Clinic Visits of College Students for Upper Respiratory Tract Infection in Wuhan, China. *Environ Sci Pollut Res* **2021**, *28*, 29820–29830, doi:10.1007/s11356-021-12828-7.
138. Liu, C.; Chen, R.; Sera, F.; Vicedo-Cabrera, A.M.; Guo, Y.; Tong, S.; Coelho, M.S.Z.S.; Saldiva, P.H.N.; Lavigne, E.; Matus, P.; et al. Ambient Particulate Air Pollution and Daily Mortality in 652 Cities. *N Engl J Med* **2019**, *381*, 705–715, doi:10.1056/NEJMoa1817364.
